# Supplementary material for: The incidence of regression after the non-surgical treatment of symptomatic lumbar disc herniation: a systematic review and meta-analysis
Source: PubMed Central journal article supplement (PMC7419225; doi:10.1186/s12891-020-03548-z), 2020-08-10
Supplement: 12891_2020_3548_MOESM1_ESM.pdf [file 12891_2020_3548_MOESM1_ESM.pdf]

**Additional file. Search strategy.**

| <b>Search</b> | <b>Query</b>                                                                                                                                                                                                                                                                                                                                                                                                                                                      |
|---------------|-------------------------------------------------------------------------------------------------------------------------------------------------------------------------------------------------------------------------------------------------------------------------------------------------------------------------------------------------------------------------------------------------------------------------------------------------------------------|
| #1            | Search ((Disc[Title]) OR "nucleus pulposus"[Title]) OR "nucleus pulpous"[Title]                                                                                                                                                                                                                                                                                                                                                                                   |
| #2            | Search (((extru*[Title]) OR Slipped[Title]) OR Hernia*[Title]) OR Displace*[Title]) OR Prolaps*[Title]                                                                                                                                                                                                                                                                                                                                                            |
| #3            | #1 AND #2                                                                                                                                                                                                                                                                                                                                                                                                                                                         |
| #4            | Search (Intervertebral Disc Displacement[MeSH Terms]) OR Intervertebral Disc Degeneration[MeSH Terms]                                                                                                                                                                                                                                                                                                                                                             |
| #5            | #3 OR #4                                                                                                                                                                                                                                                                                                                                                                                                                                                          |
| #6            | Search (((((((((((((((((((Outcome?[Title]) OR Result?[Title]) OR "Follow up"[Title]) OR Follow-up[Title]) OR observ*[Title]) OR Regress*[Title]) OR resorpt*[Title]) OR absorption?[Title]) OR absorb*[Title]) OR reduc*[Title]) OR decreas*[Title]) OR resolution?[Title]) OR change*[Title]) OR versus[Title]) OR Compar*[Title]) OR "natural history"[Title]) OR Course*[Title]) OR imag*[Title]) OR MRI[Title]) OR "Computed Tomography"[Title]) OR CT[Title] |
| #7            | #5 AND #6                                                                                                                                                                                                                                                                                                                                                                                                                                                         |

PubMed search performed on September 16, 2019.
